# Supplementary material
Source: PubMed Central journal article supplement (PMC9544477)
Supplement: DOM-24-1267-s001.pdf [file DOM-24-1267-s001.pdf]

Supplemental Materials

**A low n-6 to n-3 polyunsaturated fatty acid ratio diet improves hyperinsulinemia by restoring insulin clearance in obese youth**

Domenico Tricò<sup>1\*</sup>, Alfonso Galderisi<sup>2\*</sup>, Michelle A Van Name<sup>3</sup>, Sonia Caprio<sup>3</sup>, Stephanie Samuels<sup>3</sup>, Zhongyao Li<sup>3</sup>, Brittany T Galuppo<sup>3</sup>, Mary Savoye<sup>3</sup>, Andrea Mari<sup>4</sup>, Ariel E Feldstein<sup>5</sup>, Nicola Santoro<sup>3,6</sup>

1. Department of Surgical, Medical and Molecular Pathology and Critical Care Medicine, University of Pisa, Pisa, Italy.
2. Hopital Necker-Enfants Malades, Paris, France
3. Department of Pediatrics, Yale University School of Medicine, New Haven, CT
4. Institute of Neuroscience, National Research Council, Padua, Italy
5. Department of Pediatrics, University of California San Diego, San Diego, CA
6. Department of Medicine and Health Sciences, "V.Tiberio" University of Molise, Campobasso, Italy

\* These authors contributed equally to this work.

**Corresponding:** Domenico Tricò, Department of Surgical, Medical and Molecular Pathology and Critical Care Medicine, University of Pisa, Via Savi 10, 56126 - Pisa, Italy; Tel: +39 050 993640, Fax: +39 050 553335; email: domenico.trico@unipi.it

## Supplemental Figure 1

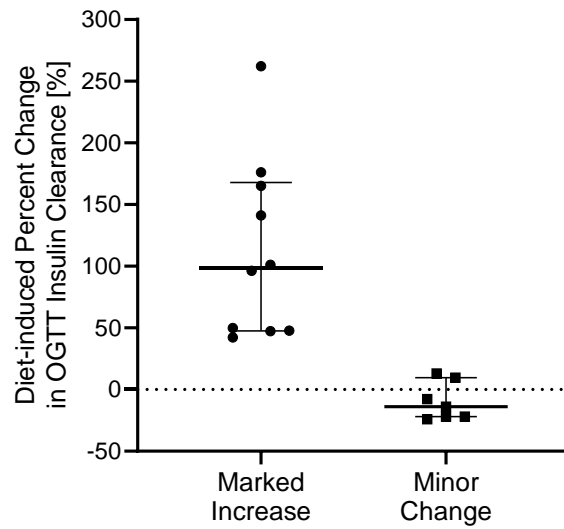

Percent changes in insulin clearance during the oral glucose tolerance test (OGTT) in participants with with or without substantial ( $\pm 25\%$  from baseline) modifications in insulin clearance.
